# Supplementary material for: The Safety of Influenza and Pertussis Vaccination in Pregnancy in a Cohort of Australian Mother-Infant Pairs, 2012–2015: The FluMum Study
Source: Oxford University Press journal article supplement (doi:10.1093/cid/ciy517), 2018-06-18
Supplement: ciy517_suppl_supplementary_material.docx [file ciy517_suppl_supplementary_material.docx]

## Supplementary material

**Table 1 :** Crude and adjusted Cox proportional-hazard ratio sensitivity analysis for time-dependent variables in ***influenza*** vaccinated FluMum study participants, Australia 2014-2015.

| **VARIABLES** | **Total**  **N (%)** | **Unvaccinated**  **N (%)** | **Vaccinated IIV**  **N (%)** | **HR* (95% CI) *P*** | **aHR*† (95% CI) *P*** |
| --- | --- | --- | --- | --- | --- |
| **Preterm birth** (<37 weeks)  1st trimester  2nd trimester  3rd trimester | 590/8,776 (7%) | 406/6,086 (7%) | 184/2,690 (7%) | 1.10 (0.92,1.31) 0.28  1.14 (0.80,1.61) 0.47  0.97 (0.77,1.23) 0.81  0.98 (0.76, 1.27) 0.87 | 1.05 (0.82,1.34) 0.69  0.95 (0.55,1.63) 0.84  0.95 (0.69,1.30) 0.73  0.95 (0.67, 1.35) 0.77 |
| **LBW** at term‡(<2500g)  1st trimester  2nd trimester  3rd trimester | 181/8,186 (2%) | 126/5,680 (2%) | 55/2,506 (2%) | 1.05 (0.76,1.44) 0.77  1.06 (0.50,2.27) 0.88  1.20 (0.78,1.85) 0.40  0.83 (0.53, 1.30) 0.41 | 0.81 (0.50,1.29) 0.37  0.50 (0.12,2.05) 0.34  0.93 (0.49,1.74) 0.81  0.63 (0.34, 1.16) 0.14 |
| **SGA total** (<10th percentile)  1st trimester  2nd trimester  3rd trimester | 864/8,769 (10%) | 609/6,082 (10%) | 255/2,687 (9%) | 0.99 (0.86,1.15) 0.94  0.96 (0.67,1.38) 0.83  0.99 (0.80,1.22) 0.90  0.96 (0.79, 1.16) 0.65 | 0.92 (0.74, 1.14) 0.43  0.88 (0.54,1.44) 0.61  0.83 (0.60,1.14) 0.24  0.91 (0.70, 1.19) 0.50 |

**Abbreviations:** IIV, inactivated influenza vaccine; 95% CI, 95% confidence interval; HR, hazard ratio; aHR, adjusted hazard ratio; LBW, low birthweight; SGA, small for gestational age.

**Note:** denominators differ due to missing data. Data restricted to the years 2014-2015 inclusive.

* Crude HR results comparing outcome variable in vaccinated group to referent (unvaccinated) group.

**†** Adjusted HR results compared to referent (unvaccinated) group, adjusting for pertussis in pregnancy

‡ t-test differences (in weeks) compared to the referent group

§ t-test differences (in grams) compared to the referent group

^ Low birthweight at term (<2500grams and ≥37 completed weeks gestation at birth)
